# Supplementary figures and images for: Activation of Estrogen Receptor Is Crucial for Resveratrol-Stimulating Muscular Glucose Uptake via Both Insulin-Dependent and -Independent Pathways
Source: Oxford University Press journal article supplement (doi:10.2337/db07-1750), 2008-04-22

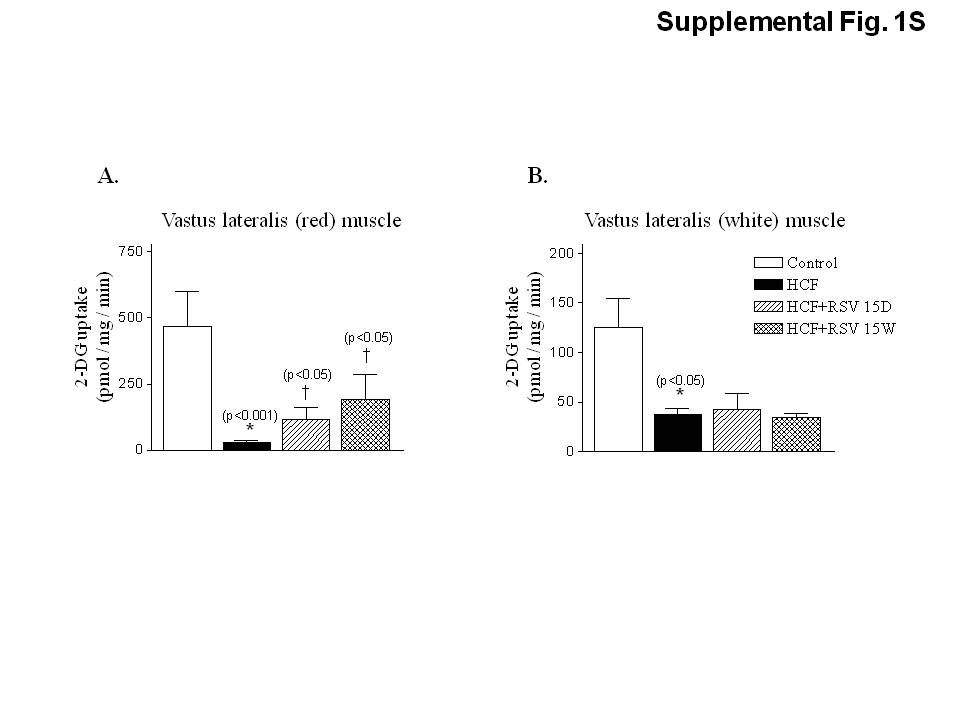


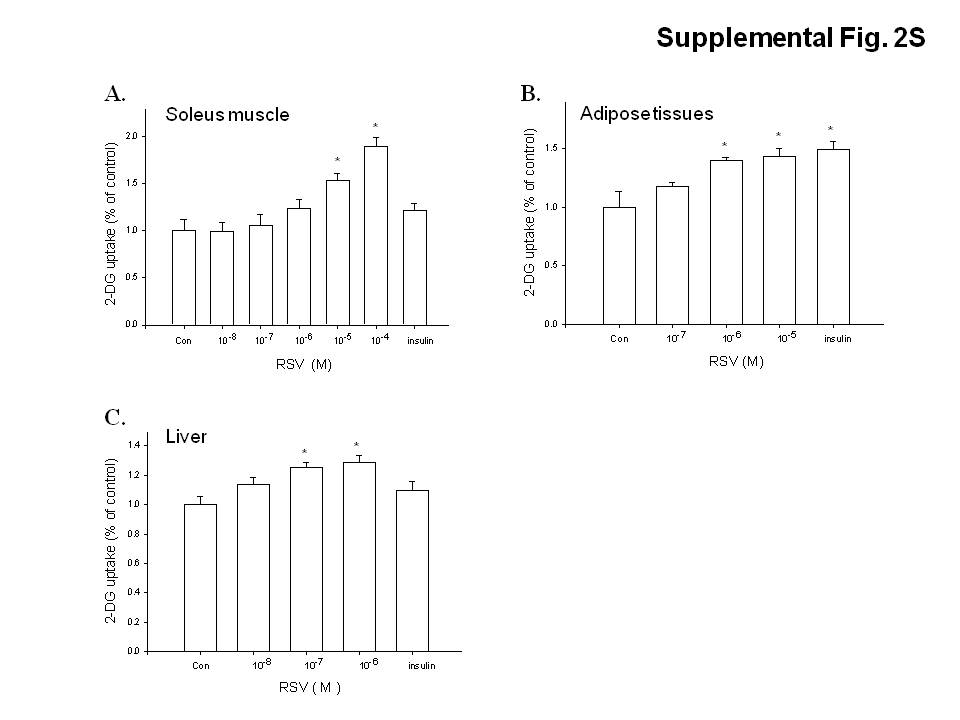


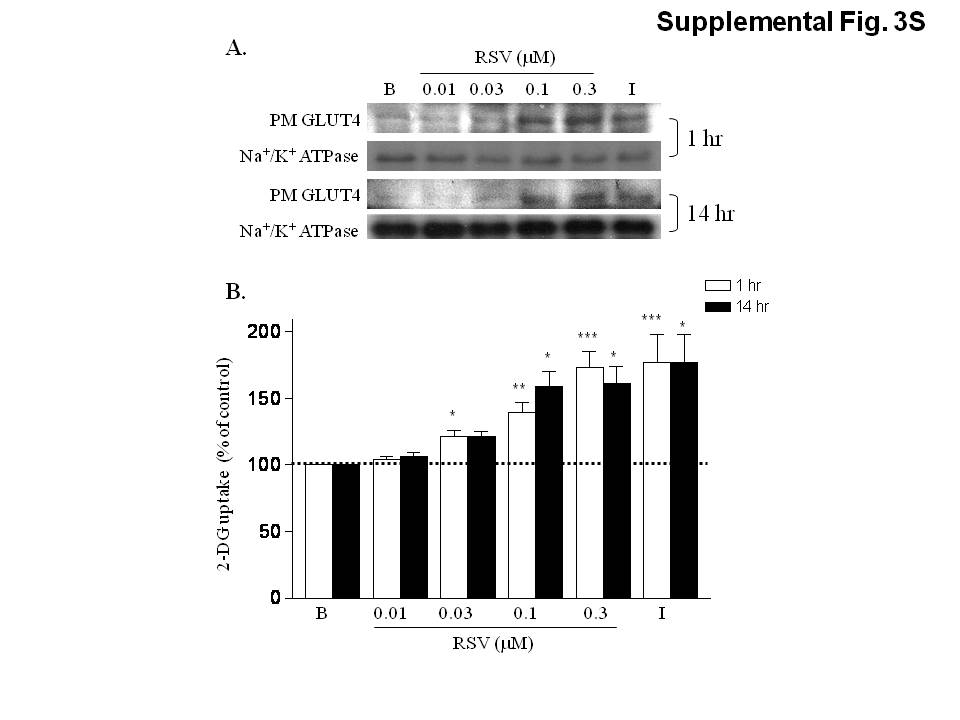


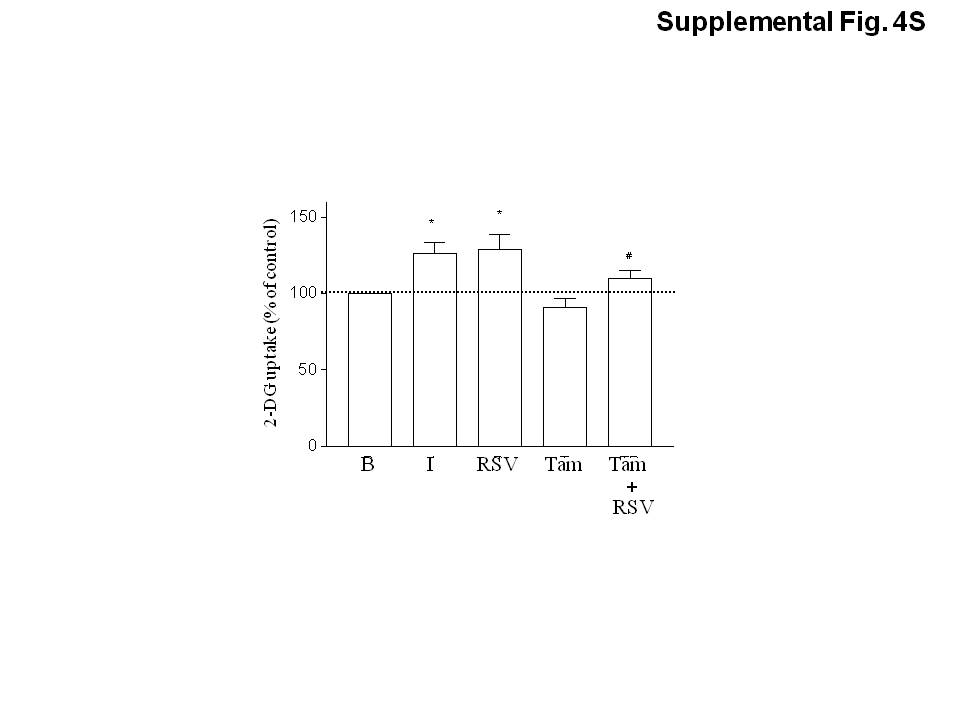

Supplement: db071750-sup-supps.doc [file db071750-sup-supps.doc]
